# Supplementary material for: Enhancing Conductivity and Self-Healing Properties of PVA/GEL/OSA Composite Hydrogels by GO/SWNTs for Electronic Skin
Source: MDPI journal article supplement (doi:10.3390/gels9020155), 2023-02-15
Supplement: s1 [file s1]

---

# **Enhancing Conductivity and Self-Healing Properties of PVA/GEL/OSA Composite Hydrogels by GO/SWNTs for Electronic Skin**

Xiaohu Chen <sup>1, 2</sup>, Haonan Zhang <sup>1,2</sup>, Jiashu Cui <sup>1,2</sup>, Yanen Wang <sup>1,2,\*</sup>, Mingyang Li <sup>1,2</sup>, Juan Zhang <sup>1,2</sup>, Changgeng Wang <sup>1,2</sup>, Zhisheng Liu <sup>1,2</sup> and Qinghua Wei <sup>1,2,\*</sup>

<sup>1</sup> Department of Industry and Engineering, School of Mechanical Engineering, Northwestern Polytechnical University, Xi'an 710072, China

<sup>2</sup> Bio-Additive Manufacturing University-Enterprise Joint Research Center of Shaanxi Province, Northwestern Polytechnical University, Xi'an, 710072, China

\* Correspondence: wangyanen@nwpu.edu.cn (Y.W.); weiqinghua@nwpu.edu.cn (Q.W.);  
Tel./Fax: +86-029-88493232

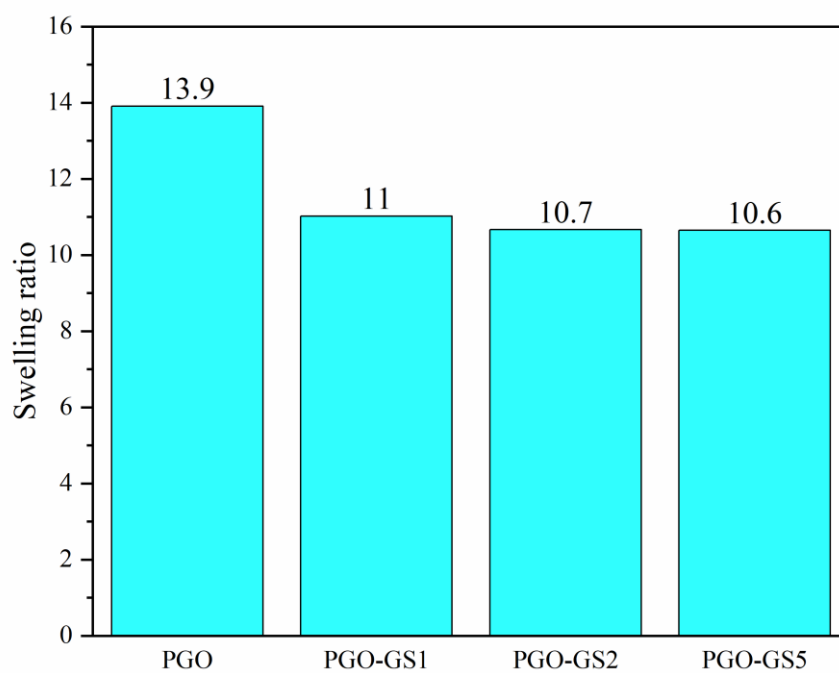

**Figure S1.** The swelling ratios of hydrogels.

**Table S1** The conductivity of hydrogels at different degrees of bending.

| Sample name | Parameter                | The distance between electric clamps<br>(5, 3, and 1 cm from left to right) |       |       |
|-------------|--------------------------|-----------------------------------------------------------------------------|-------|-------|
| PGO         | Resistance (k $\Omega$ ) | 52.33                                                                       | 53.12 | 53.40 |
|             | Conductivity (mS/m)      | 19.11                                                                       | 18.82 | 18.73 |
| PGO-GS3     | Resistance (k $\Omega$ ) | 34.32                                                                       | 36.28 | 37.59 |
|             | Conductivity (mS/m)      | 29.13                                                                       | 27.56 | 26.60 |
